# Supplementary material
Source: Springer Nature journal article supplement (https://www.springermedizin.de/resource/supplementary/12874_2009_360_MOESM2_ESM.pdf/9434308)

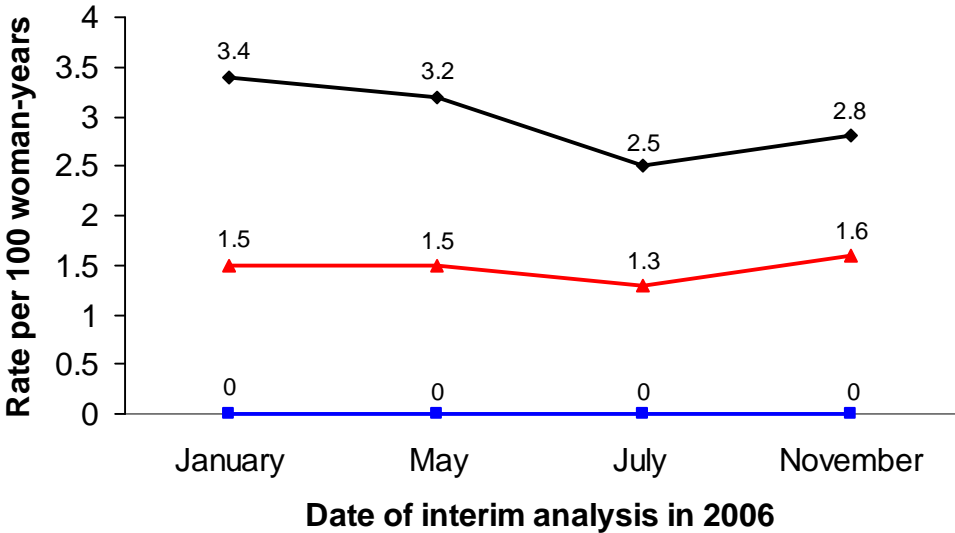

◆ Apapa clinic    ■ Ikeja clinic    ▲ Lagos pooled

Supplement: MOESM2 [file 9434308]
